# Supplementary material for: Revelation of Potent Epitopes Present in Unannotated ORF Antigens of SARS-CoV-2 for Epitope-Based Polyvalent Vaccine Design Using Immunoinformatics Approach
Source: Front Immunol. 2021 Aug 23;12:692937. doi: 10.3389/fimmu.2021.692937 (PMC8419283; doi:10.3389/fimmu.2021.692937)
Supplement: Supplementary file 5 [file DataSheet_5.xlsx]

## Sheet: A
Table SD5 (A). Details about the promiscuous epitopes from the uORF proteins and the corresponding HLA I allele binding partners. The residue numbers of an epitope (column A) located in the particular protein (column B) and the corresponding amino acid sequence (column C) are given along with the number of HLA I alleles to which the epitope binds with (column D). The names of the HLA I alleles (c…
Epitope residue number	Proteins	Epitope	Allele	HLA-Allele	Supertype	Supergroup
28 to 36	3a_iORF1 (ORF3c)	ALHFLLFFR	5	HLA-A*03:01;HLA-A*31:01;HLA-A*33:01;HLA-A*33:03;HLA-A*74:01;	A03;	S1;
19 to 27	M.ext	GTITVEELK	4	HLA-A*03:01;HLA-A*11:01;HLA-A*68:01;HLA-A*74:01;	A03;	S1;
3 to 11	7b_iORF1	IIFWFSLEL	17	HLA-A*02:01;HLA-A*02:06;HLA-A*32:01;HLA-B*46:01;HLA-C*01:02;HLA-C*02:02;HLA-C*02:09;HLA-C*03:02;HLA-C*03:03;HLA-C*03:04;HLA-C*08:01;HLA-C*12:02;HLA-C*12:03;HLA-C*15:02;HLA-C*17:01;HLA-E*01:01;HLA-E*01:03;	A01;A02;B62;UNC;	S1;S2;S6;UNC;
89 to 97	M.ext	ITGGIAIAM	11	HLA-B*46:01;HLA-C*02:02;HLA-C*02:09;HLA-C*03:02;HLA-C*03:03;HLA-C*03:04;HLA-C*12:02;HLA-C*12:03;HLA-C*15:02;HLA-C*16:01;HLA-C*17:01;	B62;UNC;	S6;UNC;
63 to 71	M.ext	KLIFLWLLW	5	HLA-A*23:01;HLA-A*32:01;HLA-B*57:01;HLA-B*58:01;HLA-B*58:02;	A01;A24;B58;	S1;S3;
5 to 13	6_iORF	KVSIWNLDY	9	HLA-A*01:01;HLA-A*03:01;HLA-A*11:01;HLA-A*29:02;HLA-A*30:02;HLA-A*32:01;HLA-A*74:01;HLA-B*15:01;HLA-B*15:25;	A01;A01;A24;A03;B62;	S1;S3;
41 to 48	N_iORF1 (ORF9b)	KVYPIILRL	59	HLA-A*02:01;HLA-A*02:06;HLA-A*03:01;HLA-A*11:01;HLA-A*23:01;HLA-A*24:02;HLA-A*25:01;HLA-A*26:01;HLA-A*29:02;HLA-A*30:01;HLA-A*30:02;HLA-A*31:01;HLA-A*32:01;HLA-A*68:02;HLA-A*74:01;HLA-B*07:02;HLA-B*13:01;HLA-B*13:02;HLA-B*14:02;HLA-B*15:01;HLA-B*15:25;HLA-B*27:02;HLA-B*27:05;HLA-B*37:01;HLA-B*46:01;HLA-B*48:01;HLA-B*51:01;HLA-B*52:01;HLA-B*55:01;HLA-B*57:01;HLA-B*58:01;HLA-B*58:02;HLA-C*01:02;HLA…	A01;A01;A24;A02;A03;A24;B07;B27;B44;B58;B62;UNC;	S1;S2;S3;S4;S6;S7;UNC;
151 to 159	M.ext	LVIGAVILR	7	HLA-A*03:01;HLA-A*11:01;HLA-A*31:01;HLA-A*33:01;HLA-A*33:03;HLA-A*68:01;HLA-A*74:01;	A03;	S1;
149 to 157	M.ext	SELVIGAVI	11	HLA-B*13:01;HLA-B*13:02;HLA-B*18:01;HLA-B*37:01;HLA-B*40:01;HLA-B*40:02;HLA-B*44:02;HLA-B*44:03;HLA-B*49:01;HLA-B*50:01;HLA-B*52:01;	B44;B62;UNC;	S3;S5;
96 to 104	7a_iORF1	SPIFLIVAA	6	HLA-B*07:02;HLA-B*35:01;HLA-B*35:03;HLA-B*51:01;HLA-B*55:01;HLA-B*56:01;	B07;	S3;S6;
102 to 110	7a_iORF1	VAAIVFITL	28	HLA-A*68:02;HLA-B*08:01;HLA-B*35:03;HLA-B*46:01;HLA-B*51:01;HLA-B*52:01;HLA-B*58:01;HLA-B*58:02;HLA-C*01:02;HLA-C*02:02;HLA-C*02:09;HLA-C*03:02;HLA-C*03:03;HLA-C*03:04;HLA-C*07:04;HLA-C*08:01;HLA-C*12:02;HLA-C*12:03;HLA-C*15:02;HLA-C*16:01;HLA-C*17:01;HLA-E*01:01;HLA-E*01:03;HLA-G*01:01;HLA-G*01:02;HLA-G*01:03;HLA-G*01:04;HLA-G*01:06;	A02;B07;B08;B58;B62;UNC;	S3;S6;UNC;
99-107	7a_iORF1	FLIVAAIVF	7	HLA-B*15:01;HLA-B*15:02;HLA-B*15:25;HLA-B*46:01;HLA-C*03:0;HLA-C*03:02;HLA-C*03:03;	B62;UNC;	S3;S6;
87-95	N_iORF1 (ORF9b),N_iORF2	LPDEFVVVT	6	HLA-B*35:01;HLA-B*35:03;HLA-B*51:01;HLA-B*53:01;HLA-B*55:01;HLA-B*56:01;	B07;	S3;

## Sheet: B
Table SD5 (B). Heatmap describing the promiscuous uORF protein epitopes binding with different HLA class I supergroups (Mukherjee et al., 2015) (columns E-L). Check Table SD5 (A) for the description of the columns A-D.
Region	Protein name	Epitope	Allele count	S1	S2	S3	S4	S5	S6	S7	UNC
41	N_iORF1 (ORF9b)	KVYPIILRL	59	10	2	13	2	0	22	2	8
102	7a_iORF1	VAAIVFITL	28	0	0	6	0	0	14	0	8
3	7b_iORF1	IIFWFSLEL	17	1	2	0	0	0	11	0	3
89	M.ext	ITGGIAIAM	11	0	0	0	0	0	10	0	1
149	M.ext	SELVIGAVI	11	0	0	10	0	1	0	0	0
5	6_iORF	KVSIWNLDY	9	7	0	2	0	0	0	0	0
151	M.ext	LVIGAVILR	7	7	0	0	0	0	0	0	0
99	7a_iORF1	FLIVAAIVF	7	0	0	3	0	0	6	0	0
96	7a_iORF1	SPIFLIVAA	6	0	0	5	0	0	1	0	0
87	ORF9b,N_iORF2	LPDEFVVVT	6	0	0	6	0	0	0	0	0
28	ORF3c	ALHFLLFFR	5	5	0	0	0	0	0	0	0
63	M.ext	KLIFLWLLW	5	2	0	3	0	0	0	0	0
19	M.ext	GTITVEELK	4	4	0	0	0	0	0	0	0

## Sheet: C
Table SD5 (C). Heatmap describing the promiscuous uORF protein epitopes binding with different HLA class I supertypes (Sydney et al., 2008) (columns E-P). Check Table SD5 (A) for the description of the columns A-D.
Resid no.	Protein name	Epitope	Allele count	A01	A01;A24	A02	A03	A24	B07	B08	B27	B44	B58	B62	Unclassified
41	ORF9b, N_iORF2	KVYPIILRL	59	5	1	3	4	2	3	0	4	1	3	4	29
102	7a_iORF1	VAAIVFITL	28	0	0	1	0	0	2	1	0	0	2	2	20
3	7b_iORF1	IIFWFSLEL	17	1	0	2	0	0	0	0	0	0	0	1	13
89	M.ext	ITGGIAIAM	11	0	0	0	0	0	0	0	0	0	0	1	10
149	M.ext	SELVIGAVI	11	0	0	0	0	0	0	0	0	7	0	1	3
5	6_iORF	KVSIWNLDY	9	3	1	0	3	0	0	0	0	0	0	2	0
151	M.ext	LVIGAVILR	7	0	0	0	7	0	0	0	0	0	0	0	0
99	7a_iORF1	FLIVAAIVF	7	0	0	0	0	0	0	0	0	0	0	4	5
96	7a_iORF1	SPIFLIVAA	6	0	0	0	0	0	6	0	0	0	0	0	0
87	ORF9b,N_iORF2	LPDEFVVVT	6	0	0	0	0	0	6	0	0	0	0	0	0
28	ORF3c	ALHFLLFFR	5	0	0	0	5	0	0	0	0	0	0	0	0
63	M.ext	KLIFLWLLW	5	1	0	0	0	1	0	0	0	0	3	0	0
19	M.ext	GTITVEELK	4	0	0	0	4	0	0	0	0	0	0	0	0
