# Supplementary material for: Revelation of Potent Epitopes Present in Unannotated ORF Antigens of SARS-CoV-2 for Epitope-Based Polyvalent Vaccine Design Using Immunoinformatics Approach
Source: Front Immunol. 2021 Aug 23;12:692937. doi: 10.3389/fimmu.2021.692937 (PMC8419283; doi:10.3389/fimmu.2021.692937)
Supplement: Supplementary file 8 [file DataSheet_8.xlsx]

## Sheet: SD8
Table SD8. Predicted B-cell conformational epitopes corresponding to SARS-CoV-2 structural proteins (Spike and N proteins). Residues with Discotope score cutoff ≥ -2.5 are considered to be a part of potential epitopes. Note that the A&G, B&H, C&I, D&J, E&K and F&L columns represent the PDB IDs, (epitope) amino acid residue number, the corresponding amino acid, number of contacts, the propensity s…
	Spike (PDB ID:6VSB)					N protein (N terminal domain PDB ID:6M3M, C-terminal domain PDB ID: 7C22)
PDB ID	Residue Number	Residue Name	Number of contacts	Propensity score	Discotope score	PDB ID	Residue Number	Residue Name	Number of contacts	Propensity score	Discotope score
6VSB	27	ALA	10	-9.96	-9.965	6M3M	49	ASN	6	0.052	-0.644
6VSB	28	TYR	7	-11.088	-10.618	6M3M	50	THR	16	-0.883	-2.621
6VSB	29	THR	29	-12.923	-14.772	6M3M	51	ALA	17	-3.561	-5.107
6VSB	30	ASN	11	-13.03	-12.796	6M3M	52	SER	25	-5.065	-7.358
6VSB	31	SER	34	-15.692	-17.797	6M3M	53	TRP	24	-5.418	-7.555
6VSB	32	PHE	12	-15.518	-15.114	6M3M	54	PHE	32	-5.972	-8.965
6VSB	33	THR	17	-16.973	-16.976	6M3M	55	THR	10	-6.142	-6.586
6VSB	34	ARG	31	-18.04	-19.53	6M3M	56	ALA	24	-5.325	-7.473
6VSB	35	GLY	36	-20.253	-22.064	6M3M	57	LEU	34	-5.377	-8.668
6VSB	36	VAL	28	-19.869	-20.804	6M3M	58	THR	8	-2.932	-3.515
6VSB	37	TYR	36	-17.391	-19.531	6M3M	59	GLN	23	-1.444	-3.923
6VSB	38	TYR	22	-13.868	-14.803	6M3M	60	HIS	7	-0.22	-1
6VSB	39	PRO	25	-14.167	-15.413	6M3M	61	GLY	11	1.885	0.404
6VSB	40	ASP	11	-9.161	-9.372	6M3M	62	LYS	0	2.932	2.595
6VSB	41	LYS	6	-5.861	-5.877	6M3M	63	GLU	16	1.213	-0.766
6VSB	42	VAL	9	-7.194	-7.402	6M3M	64	ASP	9	-0.87	-1.805
6VSB	43	PHE	3	-6.976	-6.519	6M3M	65	LEU	34	-2.824	-6.41
6VSB	44	ARG	20	-8.492	-9.815	6M3M	66	LYS	7	-2.126	-2.687
6VSB	45	SER	5	-8.159	-7.796	6M3M	67	PHE	31	-2.773	-6.019
6VSB	46	SER	2	-8.655	-7.889	6M3M	68	PRO	12	-1.508	-2.714
6VSB	47	VAL	11	-12.961	-12.735	6M3M	69	ARG	2	-1.339	-1.415
6VSB	48	LEU	18	-13.824	-14.304	6M3M	70	GLY	5	-2.529	-2.813
6VSB	49	HIS	23	-13.521	-14.611	6M3M	71	GLN	14	-3.298	-4.529
6VSB	50	SER	17	-16.49	-16.549	6M3M	72	GLY	30	-4.698	-7.608
6VSB	51	THR	21	-15.269	-15.928	6M3M	73	VAL	26	-4.66	-7.114
6VSB	52	GLN	5	-15.63	-14.408	6M3M	74	PRO	27	-4.85	-7.398
6VSB	53	ASP	25	-14.121	-15.373	6M3M	75	ILE	10	-4.095	-4.775
6VSB	54	LEU	21	-16.715	-17.208	6M3M	76	ASN	31	-3.736	-6.871
6VSB	55	PHE	35	-19.736	-21.491	6M3M	77	THR	1	-2.69	-2.496
6VSB	56	LEU	37	-19.282	-21.319	6M3M	78	ASN	11	-1.966	-3.005
6VSB	57	PRO	17	-20.722	-20.294	6M3M	79	SER	29	-1.463	-4.63
6VSB	58	PHE	24	-19.711	-20.204	6M3M	80	SER	11	-0.786	-1.961
6VSB	59	PHE	8	-18.13	-16.965	6M3M	81	PRO	3	-1.24	-1.442
6VSB	60	SER	26	-16.876	-17.925	6M3M	82	ASP	7	-0.654	-1.384
6VSB	61	ASN	5	-13.514	-12.535	6M3M	83	ASP	18	-2.012	-3.851
6VSB	62	VAL	35	-14.81	-17.132	6M3M	84	GLN	23	-3.666	-5.889
6VSB	63	THR	17	-14.1	-14.433	6M3M	85	ILE	23	-3.992	-6.178
6VSB	64	TRP	13	-14.685	-14.491	6M3M	86	GLY	35	-3.758	-7.35
6VSB	65	PHE	20	-16.397	-16.811	6M3M	87	TYR	26	-3.435	-6.03
6VSB	66	HIS	7	-13.604	-12.845	6M3M	88	TYR	32	-3.258	-6.563
6VSB	79	PHE	21	-13.938	-14.75	6M3M	89	ARG	20	-2.856	-4.828
6VSB	80	ASP	5	-14.602	-13.498	6M3M	90	ARG	22	-1.247	-3.634
6VSB	81	ASN	29	-18.964	-20.118	6M3M	91	ALA	17	-2.655	-4.305
6VSB	82	PRO	10	-16.886	-16.094	6M3M	92	THR	12	-0.336	-1.677
6VSB	83	VAL	16	-19.563	-19.153	6M3M	93	ARG	12	2.132	0.507
6VSB	84	LEU	27	-18.886	-19.819	6M3M	94	ARG	3	3.184	2.473
6VSB	85	PRO	8	-14.841	-14.054	6M3M	95	ILE	5	3.131	2.196
6VSB	86	PHE	27	-17.597	-18.678	6M3M	96	ARG	1	3.929	3.362
6VSB	87	ASN	19	-12.593	-13.33	6M3M	102	MET	7	4.692	3.347
6VSB	88	ASP	11	-14.367	-13.98	6M3M	103	LYS	4	3.712	2.825
6VSB	89	GLY	25	-19.981	-20.558	6M3M	104	ASP	10	4.007	2.397
6VSB	90	VAL	27	-23.939	-24.291	6M3M	105	LEU	11	1.05	-0.336
6VSB	91	TYR	33	-22.473	-23.683	6M3M	106	SER	15	-0.809	-2.441
6VSB	92	PHE	37	-23.726	-25.252	6M3M	107	PRO	21	-2.294	-4.445
6VSB	93	ALA	39	-21.662	-23.656	6M3M	108	ARG	13	-3.334	-4.446
6VSB	94	SER	24	-19.162	-19.718	6M3M	109	TRP	33	-3.419	-6.821
6VSB	95	THR	18	-15.542	-15.825	6M3M	110	TYR	19	-4.105	-5.818
6VSB	99	ASN	10	-14.517	-13.998	6M3M	111	PHE	32	-4.34	-7.521
6VSB	100	ILE	20	-16.895	-17.252	6M3M	112	TYR	28	-3.982	-6.744
6VSB	101	ILE	24	-22.022	-22.25	6M3M	113	TYR	25	-3.599	-6.06
6VSB	102	ARG	25	-23.66	-23.814	6M3M	114	LEU	23	-3.161	-5.443
6VSB	103	GLY	32	-26.89	-27.478	6M3M	115	GLY	14	-1.503	-2.94
6VSB	104	TRP	33	-28.019	-28.591	6M3M	116	THR	23	-2.596	-4.943
6VSB	105	ILE	34	-27.186	-27.969	6M3M	117	GLY	30	-3.013	-6.117
6VSB	106	PHE	31	-25.281	-25.939	6M3M	118	PRO	18	-2.207	-4.023
6VSB	107	GLY	30	-21.2	-22.212	6M3M	119	GLU	25	-1.771	-4.443
6VSB	108	THR	10	-14.703	-14.162	6M3M	120	ALA	14	-1.523	-2.958
6VSB	109	THR	9	-14.987	-14.299	6M3M	121	GLY	0	-0.928	-0.821
6VSB	110	LEU	24	-19.488	-20.007	6M3M	122	LEU	25	-1.164	-3.905
6VSB	111	ASP	6	-14.975	-13.943	6M3M	123	PRO	3	-1.206	-1.412
6VSB	112	SER	5	-13.39	-12.425	6M3M	124	TYR	21	-2.344	-4.489
6VSB	113	LYS	12	-10.362	-10.55	6M3M	125	GLY	7	-1.844	-2.437
6VSB	114	THR	14	-12.94	-13.062	6M3M	126	ALA	17	-0.723	-2.595
6VSB	115	GLN	19	-16.728	-16.989	6M3M	127	ASN	0	0.061	0.054
6VSB	116	SER	33	-21.792	-23.081	6M3M	128	LYS	18	0.077	-2.001
6VSB	117	LEU	31	-24.511	-25.257	6M3M	129	ASP	2	0.437	0.157
6VSB	118	LEU	31	-25.326	-25.979	6M3M	130	GLY	13	-0.959	-2.343
6VSB	119	ILE	30	-26.465	-26.872	6M3M	131	ILE	21	-2.125	-4.296
6VSB	120	VAL	23	-24.418	-24.255	6M3M	132	ILE	24	-2.811	-5.248
6VSB	121	ASN	19	-21.677	-21.369	6M3M	133	TRP	23	-3.089	-5.379
6VSB	122	ASN	16	-18.169	-17.92	6M3M	134	VAL	31	-3.868	-6.988
6VSB	123	ALA	7	-14.051	-13.24	6M3M	135	ALA	19	-3.747	-5.501
6VSB	124	THR	0	-11.774	-10.42	6M3M	136	THR	20	-2.997	-4.952
6VSB	125	ASN	7	-15.071	-14.143	6M3M	137	GLU	2	-1.397	-1.466
6VSB	126	VAL	18	-21.314	-20.933	6M3M	138	GLY	4	-1.098	-1.431
6VSB	127	VAL	12	-21.159	-20.106	6M3M	139	ALA	29	-1.697	-4.837
6VSB	128	ILE	26	-22.222	-22.657	6M3M	140	LEU	12	0.05	-1.335
6VSB	129	LYS	21	-21.645	-21.571	6M3M	141	ASN	6	-0.257	-0.917
6VSB	130	VAL	15	-20.402	-19.78	6M3M	142	THR	12	-0.226	-1.58
6VSB	131	CYS	19	-18.765	-18.792	6M3M	143	PRO	12	-0.038	-1.413
6VSB	132	GLU	7	-16.12	-15.071	6M3M	144	LYS	32	-1.029	-4.59
6VSB	133	PHE	30	-17.922	-19.311	6M3M	145	ASP	5	0.266	-0.34
6VSB	134	GLN	4	-15.963	-14.587	6M3M	146	HIS	10	-0.007	-1.156
6VSB	135	PHE	8	-15.994	-15.075	6M3M	147	ILE	31	-1.795	-5.153
6VSB	136	CYS	33	-17.397	-19.191	6M3M	148	GLY	8	-1.607	-2.342
6VSB	137	ASN	0	-13.677	-12.104	6M3M	149	THR	19	-2.901	-4.752
6VSB	138	ASP	6	-15.851	-14.718	6M3M	150	ARG	21	-2.686	-4.792
6VSB	139	PRO	29	-20.165	-21.181	6M3M	151	ASN	2	-0.985	-1.102
6VSB	140	PHE	15	-20.778	-20.114	6M3M	152	PRO	7	-1.066	-1.749
6VSB	141	LEU	19	-18.548	-18.6	6M3M	153	ALA	2	-0.444	-0.623
6VSB	142	GLY	14	-13.747	-13.776	6M3M	154	ASN	6	-0.028	-0.714
6VSB	156	GLU	7	-12.801	-12.133	6M3M	155	ASN	15	-2.116	-3.597
6VSB	157	PHE	21	-15.966	-16.545	6M3M	156	ALA	1	-3.529	-3.238
6VSB	158	ARG	12	-15.972	-15.516	6M3M	157	ALA	17	-6.18	-7.424
6VSB	159	VAL	33	-22.204	-23.446	6M3M	158	ILE	21	-6.034	-7.755
6VSB	160	TYR	19	-19.845	-19.748	6M3M	159	VAL	0	-6.667	-5.9
6VSB	161	SER	20	-16.31	-16.734	6M3M	160	LEU	28	-6.688	-9.139
6VSB	162	SER	16	-15.34	-15.416	6M3M	161	GLN	8	-5.66	-5.929
6VSB	163	ALA	9	-16.656	-15.775	6M3M	162	LEU	25	-5.855	-8.056
6VSB	164	ASN	10	-13.098	-12.742	6M3M	163	PRO	18	-4.178	-5.767
6VSB	165	ASN	10	-12.691	-12.381	6M3M	164	GLN	0	-3.703	-3.277
6VSB	166	CYS	12	-14.664	-14.358	6M3M	165	GLY	3	-2.23	-2.318
6VSB	167	THR	13	-13.835	-13.739	6M3M	166	THR	23	-3.028	-5.325
6VSB	168	PHE	24	-16.138	-17.042	6M3M	167	THR	7	-2.699	-3.193
6VSB	169	GLU	10	-17.438	-16.583	6M3M	168	LEU	19	-4.027	-5.749
6VSB	170	TYR	19	-16.738	-16.998	6M3M	169	PRO	21	-1.656	-3.881
6VSB	171	VAL	4	-15.852	-14.489	6M3M	170	LYS	3	-0.33	-0.637
6VSB	172	SER	14	-14.4	-14.354	6M3M	171	GLY	11	-0.698	-1.883
6VSB	173	GLN	5	-12.232	-11.4	6M3M	172	PHE	26	-2.813	-5.479
6VSB	174	PRO	9	-16.083	-15.268	6M3M	173	TYR	3	-5.245	-4.987
6VSB	175	PHE	37	-18.322	-20.47	6M3M	174	ALA	17	-5.958	-7.227
6VSB	176	LEU	7	-15.583	-14.596	7C22	276	ARG	7	5.666	4.209
6VSB	187	LYS	12	-6.152	-6.825	7C22	271	THR	11	5.998	4.043
6VSB	188	ASN	10	-9.798	-9.821	7C22	269	ASN	14	5.841	3.559
6VSB	189	LEU	26	-14.155	-15.518	7C22	268	TYR	9	5.145	3.518
6VSB	190	ARG	18	-18.358	-18.317	7C22	293	ARG	8	4.981	3.488
6VSB	191	GLU	33	-19.608	-21.148	7C22	275	GLY	12	5.418	3.415
6VSB	192	PHE	28	-22.523	-23.153	7C22	289	GLN	4	4.291	3.338
6VSB	193	VAL	30	-22.561	-23.416	7C22	280	GLU	6	4.503	3.295
6VSB	194	PHE	32	-24.578	-25.431	7C22	272	GLN	15	5.565	3.2
6VSB	195	LYS	23	-21.154	-21.367	7C22	265	THR	5	4.208	3.15
6VSB	196	ASN	22	-14.162	-15.063	7C22	266	LYS	4	4.054	3.128
6VSB	197	ILE	20	-12.323	-13.206	7C22	344	PRO	0	3.376	2.988
6VSB	198	ASP	3	-7.256	-6.767	7C22	267	ALA	3	3.735	2.96
6VSB	199	GLY	3	-10.054	-9.243	7C22	364	PRO	2	3.519	2.884
6VSB	200	TYR	11	-13.885	-13.553	7C22	327	SER	4	3.629	2.752
6VSB	201	PHE	26	-16.853	-17.905	7C22	294	GLN	14	4.892	2.719
6VSB	202	LYS	20	-18.288	-18.485	7C22	279	PRO	3	3.264	2.544
6VSB	203	ILE	29	-21.356	-22.235	7C22	278	GLY	8	3.836	2.475
6VSB	204	TYR	28	-18.221	-19.346	7C22	361	LYS	10	3.999	2.389
6VSB	205	SER	25	-18.108	-18.9	7C22	290	GLU	10	3.941	2.338
6VSB	206	LYS	17	-15.089	-15.309	7C22	358	ASP	6	3.377	2.299
6VSB	207	HIS	7	-13.442	-12.701	7C22	292	ILE	24	5.586	2.184
6VSB	208	THR	28	-9.892	-11.975	7C22	357	ILE	8	3.398	2.087
6VSB	209	PRO	0	-6.511	-5.762	7C22	277	ARG	23	5.342	2.083
6VSB	210	ILE	21	-8.105	-9.588	7C22	295	GLY	16	4.171	1.851
6VSB	211	ASN	0	-5.135	-4.545	7C22	342	LYS	1	2.144	1.782
6VSB	212	LEU	11	-6.495	-7.013	7C22	256	LYS	10	3.311	1.781
6VSB	213	VAL	6	-8.723	-8.41	7C22	288	ASP	13	3.688	1.769
6VSB	214	ARG	4	-6.615	-6.315	7C22	362	THR	12	3.498	1.716
6VSB	215	ASP	15	-10.823	-11.303	7C22	281	GLN	5	2.568	1.697
6VSB	216	LEU	30	-14.479	-16.264	7C22	297	ASP	13	3.591	1.683
6VSB	217	PRO	20	-12.576	-13.43	7C22	285	ASN	9	3.046	1.66
6VSB	218	GLN	1	-11.334	-10.146	7C22	360	TYR	17	4.085	1.66
6VSB	219	GLY	16	-13.097	-13.431	7C22	299	LYS	6	2.602	1.613
6VSB	220	PHE	15	-14.134	-14.234	7C22	347	LYS	1	1.88	1.549
6VSB	221	SER	25	-13.931	-15.204	7C22	354	ASN	6	2.465	1.491
6VSB	222	ALA	24	-15.144	-16.162	7C22	270	VAL	23	4.643	1.464
6VSB	223	LEU	28	-17.615	-18.809	7C22	328	GLY	6	2.402	1.435
6VSB	224	GLU	10	-13.824	-13.384	7C22	282	THR	9	2.744	1.394
6VSB	225	PRO	18	-13.746	-14.235	7C22	348	ASP	10	2.784	1.314
6VSB	226	LEU	26	-13.631	-15.054	7C22	263	THR	6	2.221	1.275
6VSB	227	VAL	18	-15.172	-15.497	7C22	345	ASN	9	2.61	1.275
6VSB	228	ASP	11	-14.593	-14.18	7C22	261	LYS	3	1.803	1.25
6VSB	229	LEU	30	-15.94	-17.557	7C22	273	ALA	24	4.472	1.197
6VSB	230	PRO	0	-11.304	-10.004	7C22	259	ARG	12	2.824	1.119
6VSB	231	ILE	33	-14.615	-16.729	7C22	351	ILE	6	2.039	1.114
6VSB	232	GLY	4	-11.348	-10.503	7C22	291	LEU	25	4.416	1.033
6VSB	233	ILE	29	-14.146	-15.854	7C22	258	PRO	6	1.916	1.006
6VSB	234	ASN	4	-12.343	-11.383	7C22	283	GLN	17	3.335	0.997
6VSB	235	ILE	32	-16.542	-18.32	7C22	326	PRO	1	1.208	0.954
6VSB	236	THR	6	-13.785	-12.889	7C22	355	LYS	17	3.183	0.862
6VSB	237	ARG	16	-19.499	-19.096	7C22	343	ASP	13	2.592	0.799
6VSB	238	PHE	34	-24.75	-25.814	7C22	341	ASP	1	1.001	0.771
6VSB	239	GLN	22	-25.171	-24.806	7C22	302	PRO	3	1.223	0.737
6VSB	240	THR	32	-26.192	-26.86	7C22	325	THR	9	1.982	0.719
6VSB	241	LEU	33	-25.925	-26.739	7C22	359	ALA	17	3.003	0.703
6VSB	242	LEU	21	-21.816	-21.722	7C22	363	PHE	19	3.235	0.678
6VSB	243	ALA	15	-18.981	-18.524	7C22	286	PHE	16	2.556	0.422
6VSB	244	LEU	11	-14.119	-13.76	7C22	274	PHE	26	3.841	0.409
6VSB	245	HIS	11	-8.739	-8.999	7C22	296	THR	12	2.01	0.398
6VSB	246	ARG	2	-5.271	-4.895	7C22	346	PHE	8	1.489	0.398
6VSB	261	GLY	4	-8.763	-8.215	7C22	329	THR	1	0.497	0.325
6VSB	262	ALA	18	-13.696	-14.191	7C22	262	ARG	20	2.953	0.313
6VSB	263	ALA	20	-13.494	-14.242	7C22	356	HIS	24	3.431	0.277
6VSB	264	ALA	17	-16.875	-16.889	7C22	284	GLY	20	2.906	0.271
6VSB	265	TYR	30	-20.86	-21.912	7C22	257	LYS	13	1.821	0.117
6VSB	266	TYR	29	-20.413	-21.4	7C22	301	TRP	17	2.305	0.085
6VSB	267	VAL	22	-22.507	-22.448	7C22	287	GLY	30	3.957	0.052
6VSB	268	GLY	33	-20.679	-22.096	7C22	324	VAL	0	0.027	0.024
6VSB	269	TYR	12	-19.144	-18.323	7C22	264	ALA	30	3.893	-0.005
6VSB	270	LEU	30	-18.7	-19.999	7C22	260	GLN	10	1.27	-0.026
6VSB	271	GLN	17	-14.892	-15.135	7C22	300	HIS	19	2.405	-0.056
6VSB	272	PRO	4	-13.528	-12.432	7C22	352	LEU	17	2.035	-0.154
6VSB	273	ARG	23	-17.55	-18.177	7C22	298	TYR	28	3.393	-0.217
6VSB	274	THR	16	-15.874	-15.889	7C22	350	VAL	10	0.832	-0.414
6VSB	275	PHE	26	-18.42	-19.291	7C22	353	LEU	16	1.474	-0.536
6VSB	276	LEU	19	-17.45	-17.629	7C22	340	ASP	8	0.058	-0.869
6VSB	277	LEU	33	-15.07	-17.132	7C22	349	GLN	17	1.025	-1.048
6VSB	278	LYS	17	-13.313	-13.737	7C22	330	TRP	12	0.169	-1.231
6VSB	279	TYR	19	-11.396	-12.271	7C22	304	ILE	22	1.452	-1.245
6VSB	280	ASN	9	-7.404	-7.588	7C22	323	GLU	10	-0.4	-1.504
6VSB	281	GLU	0	-3.366	-2.979	7C22	322	MET	1	-1.575	-1.509
6VSB	282	ASN	7	-2.664	-3.162	7C22	303	GLN	19	0.674	-1.589
6VSB	283	GLY	8	-6.652	-6.807	7C22	305	ALA	13	-0.209	-1.68
6VSB	284	THR	8	-9.444	-9.278	7C22	336	ALA	1	-2.638	-2.45
6VSB	285	ILE	30	-13.856	-15.712	7C22	331	LEU	7	-1.86	-2.451
6VSB	286	THR	14	-12.428	-12.609	7C22	308	ALA	14	-1.125	-2.606
6VSB	287	ASP	14	-14.844	-14.747	7C22	306	GLN	17	-0.771	-2.637
6VSB	288	ALA	36	-18.065	-20.127	7C22	338	LYS	5	-2.431	-2.726
6VSB	289	VAL	25	-19.542	-20.17	7C22	321	GLY	10	-1.923	-2.852
6VSB	290	ASP	21	-20.704	-20.738	7C22	332	THR	12	-2.002	-3.151
6VSB	291	CYS	23	-20.298	-20.609	7C22	339	LEU	15	-1.649	-3.185
6VSB	292	ALA	15	-21.602	-20.842	7C22	307	PHE	22	-1.246	-3.633
6VSB	293	LEU	22	-21.558	-21.609	7C22	312	SER	0	-4.339	-3.84
6VSB	294	ASP	17	-22.863	-22.189	7C22	320	ILE	9	-3.393	-4.038
6VSB	295	PRO	27	-24.468	-24.759	7C22	334	THR	6	-3.927	-4.165
6VSB	296	LEU	21	-25.607	-25.077	7C22	319	ARG	4	-4.439	-4.388
6VSB	297	SER	19	-21.95	-21.611	7C22	311	ALA	2	-4.701	-4.391
6VSB	298	GLU	22	-23.863	-23.649	7C22	309	PRO	17	-3.299	-4.875
6VSB	299	THR	27	-22.92	-23.389	7C22	337	ILE	19	-3.059	-4.893
6VSB	300	LYS	29	-18.98	-20.132	7C22	310	SER	3	-5.213	-4.959
6VSB	301	CYS	22	-19.967	-20.201	7C22	315	PHE	5	-5.078	-5.069
6VSB	302	THR	17	-17.662	-17.586	7C22	333	TYR	17	-3.628	-5.166
6VSB	303	LEU	24	-16.416	-17.288	7C22	316	GLY	7	-5.029	-5.256
6VSB	304	LYS	11	-16.734	-16.074	7C22	313	ALA	10	-5.34	-5.876
6VSB	305	SER	11	-17.189	-16.478	7C22	335	GLY	21	-3.976	-5.933
6VSB	306	PHE	15	-16.109	-15.982	7C22	317	MET	13	-5.019	-5.937
6VSB	307	THR	4	-16.041	-14.656	7C22	314	PHE	12	-5.676	-6.404
6VSB	308	VAL	28	-20.311	-21.196	7C22	318	SER	16	-5.263	-6.498
6VSB	309	GLU	6	-20.171	-18.542
6VSB	310	LYS	16	-21.613	-20.968
6VSB	311	GLY	9	-22.021	-20.524
6VSB	312	ILE	25	-24.155	-24.252
6VSB	313	TYR	22	-23.991	-23.762
6VSB	314	GLN	11	-22.285	-20.987
6VSB	315	THR	28	-21.294	-22.065
6VSB	316	SER	17	-20.075	-19.721
6VSB	317	ASN	8	-19.262	-17.967
6VSB	318	PHE	23	-18.551	-19.062
6VSB	319	ARG	12	-18.288	-17.565
6VSB	320	VAL	27	-17.119	-18.255
6VSB	321	GLN	1	-13.221	-11.816
6VSB	322	PRO	17	-10.458	-11.21
6VSB	323	THR	9	-8.644	-8.685
6VSB	324	GLU	10	-6.884	-7.242
6VSB	325	SER	13	-6.025	-6.827
6VSB	326	ILE	22	-7.226	-8.925
6VSB	327	VAL	6	-9.922	-9.471
6VSB	328	ARG	30	-10.292	-12.558
6VSB	335	LEU	11	-21.267	-20.086
6VSB	336	CYS	32	-24.03	-24.946
6VSB	337	PRO	7	-22.73	-20.921
6VSB	338	PHE	24	-27.066	-26.714
6VSB	339	GLY	3	-21.413	-19.295
6VSB	340	GLU	10	-20.302	-19.117
6VSB	341	VAL	28	-25.633	-25.905
6VSB	342	PHE	25	-24.119	-24.22
6VSB	343	ASN	8	-18.273	-17.091
6VSB	344	ALA	22	-16.214	-16.879
6VSB	345	THR	0	-11.353	-10.047
6VSB	346	ARG	5	-10.135	-9.544
6VSB	347	PHE	35	-13.274	-15.773
6VSB	348	ALA	16	-10.131	-10.806
6VSB	349	SER	18	-7.983	-9.135
6VSB	350	VAL	36	-9.713	-12.736
6VSB	351	TYR	12	-6.405	-7.048
6VSB	352	ALA	11	-7.458	-7.865
6VSB	353	TRP	28	-11.326	-13.244
6VSB	354	ASN	16	-14.424	-14.605
6VSB	355	ARG	17	-21.308	-20.813
6VSB	356	LYS	17	-23.227	-22.511
6VSB	357	ARG	9	-24.737	-22.927
6VSB	358	ILE	31	-27.168	-27.609
6VSB	359	SER	18	-23.791	-23.125
6VSB	360	ASN	2	-19.556	-17.537
6VSB	361	CYS	16	-21.618	-20.972
6VSB	362	VAL	7	-22.152	-20.409
6VSB	363	ALA	33	-25.818	-26.644
6VSB	364	ASP	10	-23.547	-21.99
6VSB	365	TYR	30	-26.313	-26.737
6VSB	366	SER	9	-21.778	-20.308
6VSB	367	VAL	15	-21.559	-20.805
6VSB	368	LEU	30	-24.62	-25.238
6VSB	369	TYR	20	-22.986	-22.643
6VSB	370	ASN	8	-18.454	-17.252
6VSB	371	SER	7	-16.672	-15.56
6VSB	372	ALA	0	-13.063	-11.561
6VSB	373	SER	17	-15.629	-15.787
6VSB	374	PHE	25	-17.767	-18.599
6VSB	375	SER	20	-13.586	-14.324
6VSB	376	THR	30	-16.561	-18.107
6VSB	377	PHE	17	-21.75	-21.204
6VSB	378	LYS	12	-21.049	-20.009
6VSB	379	CYS	17	-25.038	-24.114
6VSB	380	TYR	19	-22.638	-22.22
6VSB	381	GLY	18	-21.497	-21.095
6VSB	382	VAL	21	-22.724	-22.526
6VSB	383	SER	3	-22.292	-20.073
6VSB	384	PRO	17	-23.75	-22.974
6VSB	385	THR	0	-21.618	-19.132
6VSB	386	LYS	5	-22.574	-20.553
6VSB	387	LEU	32	-26.356	-27.005
6VSB	388	ASN	13	-23.791	-22.55
6VSB	389	ASP	6	-20.364	-18.713
6VSB	390	LEU	19	-23.147	-22.67
6VSB	391	CYS	13	-23.945	-22.687
6VSB	392	PHE	30	-24.895	-25.482
6VSB	393	THR	8	-22.026	-20.413
6VSB	394	ASN	9	-24.651	-22.851
6VSB	395	VAL	30	-29.143	-29.242
6VSB	396	TYR	13	-27.391	-25.736
6VSB	397	ALA	24	-27.525	-27.12
6VSB	398	ASP	24	-23.773	-23.799
6VSB	399	SER	20	-20.374	-20.331
6VSB	400	PHE	31	-14.107	-16.05
6VSB	401	VAL	28	-11.893	-13.745
6VSB	402	ILE	36	-9.398	-12.457
6VSB	403	ARG	21	-7.017	-8.625
6VSB	404	GLY	18	-7.778	-8.954
6VSB	405	ASP	8	-5.611	-5.886
6VSB	406	GLU	32	-7.445	-10.269
6VSB	407	VAL	25	-11.413	-12.975
6VSB	408	ARG	6	-9.908	-9.459
6VSB	409	GLN	24	-9.519	-11.184
6VSB	410	ILE	35	-13.961	-16.381
6VSB	411	ALA	15	-14.1	-14.204
6VSB	412	PRO	13	-9.114	-9.561
6VSB	413	GLY	5	-6.238	-6.096
6VSB	414	GLN	21	-5.967	-7.696
6VSB	415	THR	0	-3.819	-3.38
6VSB	416	GLY	18	-3.528	-5.193
6VSB	417	LYS	16	-2.185	-3.774
6VSB	418	ILE	25	-5.862	-8.063
6VSB	419	ALA	14	-6.923	-7.737
6VSB	420	ASP	4	-3.618	-3.662
6VSB	421	TYR	9	-3.315	-3.969
6VSB	422	ASN	34	-6.521	-9.681
6VSB	423	TYR	32	-9.164	-11.79
6VSB	424	LYS	8	-8.301	-8.266
6VSB	425	LEU	31	-12.081	-14.257
6VSB	426	PRO	8	-9.051	-8.93
6VSB	427	ASP	2	-7.59	-6.947
6VSB	428	ASP	11	-13.064	-12.827
6VSB	429	PHE	12	-18.332	-17.604
6VSB	430	THR	23	-24.986	-24.758
6VSB	431	GLY	31	-28.707	-28.971
6VSB	432	CYS	28	-28.404	-28.358
6VSB	433	VAL	21	-26.268	-25.662
6VSB	434	ILE	26	-24.897	-25.024
6VSB	435	ALA	26	-17.271	-18.275
6VSB	436	TRP	17	-15.713	-15.861
6VSB	437	ASN	11	-9.774	-9.915
6VSB	438	SER	33	-9.501	-12.203
6VSB	439	ASN	15	-4.159	-5.406
6VSB	440	ASN	6	-4.5	-4.672
6VSB	441	LEU	13	-5.664	-6.508
6VSB	442	ASP	31	-5.345	-8.296
6VSB	443	SER	26	-2.195	-4.933
6VSB	449	TYR	4	-0.567	-0.962
6VSB	450	ASN	11	-1.78	-2.841
6VSB	451	TYR	32	-4.624	-7.772
6VSB	452	LEU	9	-4.348	-4.883
6VSB	453	TYR	29	-3.805	-6.703
6VSB	454	ARG	14	-1.224	-2.694
6VSB	491	PRO	7	-0.72	-1.442
6VSB	492	LEU	15	-0.95	-2.565
6VSB	493	GLN	9	-0.572	-1.541
6VSB	494	SER	7	-0.846	-1.553
6VSB	495	TYR	36	-1.846	-5.774
6VSB	496	GLY	3	0.041	-0.309
6VSB	497	PHE	28	-1.613	-4.647
6VSB	498	GLN	4	0.68	0.142
6VSB	499	PRO	5	0.178	-0.417
6VSB	500	THR	0	1.907	1.688
6VSB	503	VAL	5	-1.856	-2.218
6VSB	504	GLY	3	-3.961	-3.851
6VSB	505	TYR	8	-1.528	-2.272
6VSB	506	GLN	15	-3.424	-4.755
6VSB	507	PRO	27	-7.456	-9.703
6VSB	508	TYR	27	-10.649	-12.53
6VSB	509	ARG	23	-15.116	-16.022
6VSB	510	VAL	38	-18.633	-20.861
6VSB	511	VAL	29	-25.213	-25.648
6VSB	512	VAL	25	-27.713	-27.401
6VSB	513	LEU	35	-29.999	-30.574
6VSB	514	SER	21	-28.366	-27.519
6VSB	515	PHE	30	-28.005	-28.234
6VSB	516	GLU	17	-23.679	-22.911
6VSB	517	LEU	11	-20.838	-19.706
6VSB	518	LEU	0	-17.441	-15.436
6VSB	519	HIS	12	-15.167	-14.803
6VSB	520	ALA	8	-14.202	-13.489
6VSB	521	PRO	2	-14.696	-13.236
6VSB	522	ALA	15	-20.16	-19.567
6VSB	523	THR	14	-20.814	-20.03
6VSB	524	VAL	24	-24.489	-24.433
6VSB	525	CYS	15	-24.549	-23.451
6VSB	526	GLY	18	-24.024	-23.331
6VSB	527	PRO	11	-19.38	-18.416
6VSB	528	LYS	20	-16.124	-16.57
6VSB	529	LYS	10	-11.489	-11.318
6VSB	530	SER	14	-9.561	-10.072
6VSB	531	THR	12	-7.795	-8.279
6VSB	532	ASN	3	-4.817	-4.608
6VSB	533	LEU	25	-4.549	-6.901
6VSB	534	VAL	15	-6.474	-7.454
6VSB	535	LYS	10	-7.943	-8.18
6VSB	536	ASN	3	-9.706	-8.935
6VSB	537	LYS	13	-10.569	-10.848
6VSB	538	CYS	12	-12.62	-12.549
6VSB	539	VAL	22	-9.474	-10.915
6VSB	540	ASN	5	-7.274	-7.012
6VSB	541	PHE	32	-8.158	-10.9
6VSB	542	ASN	10	-9.692	-9.728
6VSB	543	PHE	29	-9.939	-12.131
6VSB	544	ASN	21	-12.196	-13.209
6VSB	545	GLY	13	-11.336	-11.527
6VSB	546	LEU	22	-10.197	-11.554
6VSB	547	THR	3	-8.575	-7.934
6VSB	548	GLY	17	-6.558	-7.759
6VSB	549	THR	13	-8.834	-9.313
6VSB	550	GLY	19	-11.083	-11.993
6VSB	551	VAL	11	-11.662	-11.586
6VSB	552	LEU	27	-9.848	-11.82
6VSB	553	THR	12	-8.712	-9.09
6VSB	554	GLU	0	-6.24	-5.522
6VSB	555	SER	24	-6.305	-8.34
6VSB	556	ASN	2	-3.79	-3.584
6VSB	557	LYS	17	-3.575	-5.119
6VSB	558	LYS	2	-1.479	-1.539
6VSB	559	PHE	22	-2.397	-4.651
6VSB	560	LEU	2	-1.137	-1.236
6VSB	561	PRO	0	-0.961	-0.851
6VSB	562	PHE	0	-2.061	-1.824
6VSB	563	GLN	15	-3.013	-4.391
6VSB	564	GLN	9	-5.498	-5.901
6VSB	565	PHE	25	-4.345	-6.72
6VSB	566	GLY	18	-4.638	-6.175
6VSB	567	ARG	7	-5.182	-5.391
6VSB	568	ASP	11	-3.846	-4.669
6VSB	569	ILE	0	-4.324	-3.826
6VSB	570	ALA	0	-5.047	-4.466
6VSB	571	ASP	3	-5.058	-4.821
6VSB	572	THR	7	-6.423	-6.489
6VSB	573	THR	25	-6.474	-8.604
6VSB	574	ASP	11	-6.637	-7.138
6VSB	575	ALA	16	-6.826	-7.881
6VSB	576	VAL	27	-5.618	-8.077
6VSB	577	ARG	12	-4.294	-5.18
6VSB	578	ASP	25	-7.528	-9.538
6VSB	579	PRO	17	-8.168	-9.184
6VSB	580	GLN	15	-9.212	-9.877
6VSB	581	THR	17	-5.091	-6.461
6VSB	582	LEU	3	-5.068	-4.83
6VSB	583	GLU	14	-3.622	-4.815
6VSB	584	ILE	15	-4.935	-6.093
6VSB	585	LEU	29	-6.364	-8.967
6VSB	586	ASP	11	-7.386	-7.801
6VSB	587	ILE	27	-8.966	-11.04
6VSB	588	THR	14	-10.455	-10.862
6VSB	589	PRO	11	-11.447	-11.396
6VSB	590	CYS	25	-15.107	-16.245
6VSB	591	SER	15	-17.395	-17.119
6VSB	592	PHE	15	-18.917	-18.467
6VSB	593	GLY	19	-20.586	-20.403
6VSB	594	GLY	13	-21.696	-20.696
6VSB	595	VAL	25	-25.761	-25.673
6VSB	596	SER	23	-25.445	-25.164
6VSB	597	VAL	25	-26.731	-26.532
6VSB	598	ILE	31	-25.647	-26.263
6VSB	599	THR	27	-23.948	-24.299
6VSB	600	PRO	17	-19.245	-18.987
6VSB	601	GLY	9	-20.114	-18.836
6VSB	602	THR	17	-17.229	-17.203
6VSB	603	ASN	3	-14.684	-13.34
6VSB	604	THR	17	-15.082	-15.303
6VSB	605	SER	17	-16.684	-16.721
6VSB	606	ASN	7	-19.151	-17.754
6VSB	607	GLN	19	-20.704	-20.508
6VSB	608	VAL	27	-24.903	-25.144
6VSB	609	ALA	34	-26.746	-27.58
6VSB	610	VAL	24	-28.144	-27.667
6VSB	611	LEU	29	-27.635	-27.792
6VSB	612	TYR	21	-25.996	-25.422
6VSB	613	GLN	16	-23.834	-22.933
6VSB	614	ASP	8	-19.807	-18.449
6VSB	615	VAL	25	-19.864	-20.454
6VSB	616	ASN	7	-17.991	-16.727
6VSB	617	CYS	19	-20.562	-20.383
6VSB	618	THR	7	-16.083	-15.038
6VSB	619	GLU	12	-17.166	-16.572
6VSB	620	VAL	7	-20.214	-18.694
6VSB	640	SER	16	-16.036	-16.032
6VSB	641	ASN	20	-17.956	-18.191
6VSB	642	VAL	6	-20.015	-18.403
6VSB	643	PHE	20	-20.389	-20.344
6VSB	644	GLN	6	-21.175	-19.43
6VSB	645	THR	33	-21.145	-22.508
6VSB	646	ARG	9	-18.617	-17.511
6VSB	647	ALA	22	-21.621	-21.664
6VSB	648	GLY	28	-22.35	-23
6VSB	649	CYS	16	-23.408	-22.556
6VSB	650	LEU	32	-26.022	-26.709
6VSB	651	ILE	16	-24.863	-23.844
6VSB	652	GLY	21	-23.525	-23.235
6VSB	653	ALA	34	-22.12	-23.486
6VSB	654	GLU	11	-18.068	-17.255
6VSB	655	HIS	16	-18.187	-17.936
6VSB	656	VAL	20	-15.695	-16.19
6VSB	657	ASN	0	-13.06	-11.558
6VSB	658	ASN	3	-11.541	-10.559
6VSB	659	SER	9	-13.248	-12.76
6VSB	660	TYR	16	-13.815	-14.066
6VSB	661	GLU	3	-14.944	-13.571
6VSB	662	CYS	13	-17.105	-16.633
6VSB	663	ASP	17	-18.731	-18.532
6VSB	664	ILE	26	-20.896	-21.483
6VSB	665	PRO	4	-20.105	-18.253
6VSB	666	ILE	41	-21.517	-23.757
6VSB	667	GLY	21	-19.824	-19.96
6VSB	668	ALA	12	-17.734	-17.074
6VSB	669	GLY	8	-16.998	-15.963
6VSB	670	ILE	25	-20.373	-20.905
6VSB	671	CYS	17	-20.962	-20.506
6VSB	672	ALA	35	-21.964	-23.463
6VSB	687	VAL	21	-16.939	-17.406
6VSB	688	ALA	17	-14.338	-14.644
6VSB	689	SER	5	-9.02	-8.557
6VSB	690	GLN	0	-10.155	-8.987
6VSB	691	SER	12	-14.835	-14.509
6VSB	692	ILE	33	-20.356	-21.81
6VSB	693	ILE	15	-19.275	-18.783
6VSB	694	ALA	28	-20.872	-21.692
6VSB	695	TYR	16	-18.946	-18.607
6VSB	696	THR	7	-17.256	-16.077
6VSB	697	MET	14	-15.201	-15.063
6VSB	698	SER	10	-11.879	-11.663
6VSB	699	LEU	4	-8.823	-8.269
6VSB	700	GLY	2	-8.377	-7.643
6VSB	701	ALA	3	-6.57	-6.16
6VSB	702	GLU	5	-4.794	-4.818
6VSB	703	ASN	4	-2.02	-2.248
6VSB	704	SER	3	-1.469	-1.645
6VSB	705	VAL	10	-2.821	-3.646
6VSB	706	ALA	10	-3.41	-4.168
6VSB	707	TYR	2	-4.181	-3.93
6VSB	708	SER	13	-4.948	-5.874
6VSB	709	ASN	4	-5.958	-5.733
6VSB	710	ASN	9	-7.025	-7.252
6VSB	711	SER	13	-6.811	-7.522
6VSB	712	ILE	23	-6.715	-8.588
6VSB	713	ALA	11	-3.684	-4.525
6VSB	714	ILE	25	-3.286	-5.783
6VSB	715	PRO	19	-3.291	-5.097
6VSB	716	THR	12	-3.052	-4.081
6VSB	717	ASN	8	-3.623	-4.126
6VSB	718	PHE	35	-7.863	-10.984
6VSB	719	THR	10	-8.738	-8.883
6VSB	720	ILE	30	-12.087	-14.147
6VSB	721	SER	17	-18.201	-18.063
6VSB	722	VAL	32	-23.329	-24.326
6VSB	723	THR	22	-24.98	-24.638
6VSB	724	THR	30	-26.207	-26.643
6VSB	725	GLU	29	-26.233	-26.551
6VSB	726	ILE	22	-25.578	-25.166
6VSB	727	LEU	31	-25.739	-26.344
6VSB	728	PRO	26	-25.214	-25.305
6VSB	729	VAL	35	-25.473	-26.569
6VSB	730	SER	31	-22.658	-23.617
6VSB	731	MET	35	-18.525	-20.419
6VSB	732	THR	23	-18.211	-18.762
6VSB	733	LYS	18	-18.595	-18.527
6VSB	734	THR	33	-17.957	-19.687
6VSB	735	SER	13	-19.467	-18.723
6VSB	736	VAL	35	-22.306	-23.766
6VSB	737	ASP	15	-22.127	-21.308
6VSB	738	CYS	30	-24.716	-25.324
6VSB	739	THR	14	-23.736	-22.616
6VSB	740	MET	11	-23.096	-21.705
6VSB	741	TYR	32	-24.403	-25.276
6VSB	742	ILE	36	-24.62	-25.929
6VSB	743	CYS	22	-23.073	-22.949
6VSB	744	GLY	21	-20.879	-20.893
6VSB	745	ASP	6	-15.794	-14.668
6VSB	746	SER	30	-16.698	-18.228
6VSB	747	THR	0	-15.627	-13.83
6VSB	748	GLU	19	-15.373	-15.79
6VSB	749	CYS	27	-18.817	-19.758
6VSB	750	SER	13	-19.825	-19.04
6VSB	751	ASN	12	-15.244	-14.871
6VSB	752	LEU	26	-17.643	-18.604
6VSB	753	LEU	28	-20.822	-21.648
6VSB	754	LEU	6	-17.45	-16.133
6VSB	755	GLN	14	-15.6	-15.416
6VSB	756	TYR	26	-17.32	-18.318
6VSB	757	GLY	1	-15.518	-13.848
6VSB	758	SER	4	-17.166	-15.652
6VSB	759	PHE	26	-21.854	-22.331
6VSB	760	CYS	22	-22.884	-22.782
6VSB	761	THR	5	-20.214	-18.464
6VSB	762	GLN	15	-18.096	-17.74
6VSB	763	LEU	27	-20.842	-21.55
6VSB	764	ASN	13	-20.327	-19.485
6VSB	765	ARG	5	-17.55	-16.107
6VSB	766	ALA	20	-16.891	-17.249
6VSB	767	LEU	27	-18.332	-19.328
6VSB	768	THR	8	-15.936	-15.024
6VSB	769	GLY	15	-14.681	-14.717
6VSB	770	ILE	30	-17.329	-18.786
6VSB	771	ALA	20	-18.207	-18.414
6VSB	772	VAL	6	-15.738	-14.618
6VSB	773	GLU	19	-14.218	-14.768
6VSB	774	GLN	31	-17.44	-18.999
6VSB	775	ASP	15	-15.337	-15.298
6VSB	776	LYS	14	-14.561	-14.496
6VSB	777	ASN	32	-20.497	-21.82
6VSB	778	THR	28	-21.689	-22.415
6VSB	779	GLN	8	-19.05	-17.78
6VSB	780	GLU	21	-20.554	-20.605
6VSB	781	VAL	37	-25.257	-26.607
6VSB	782	PHE	33	-24.216	-25.226
6VSB	783	ALA	13	-19.431	-18.692
6VSB	784	GLN	32	-19.434	-20.879
6VSB	785	VAL	28	-17.339	-18.565
6VSB	786	LYS	13	-13.039	-13.034
6VSB	787	GLN	9	-11.861	-11.532
6VSB	788	ILE	10	-12.107	-11.864
6VSB	789	TYR	29	-13.491	-15.275
6VSB	790	LYS	4	-10.597	-9.838
6VSB	791	THR	29	-12.824	-14.684
6VSB	792	PRO	17	-5.818	-7.104
6VSB	793	PRO	1	-2.278	-2.131
6VSB	794	ILE	1	-2.5	-2.327
6VSB	795	LYS	17	-5.668	-6.971
6VSB	796	ASP	2	-6.476	-5.961
6VSB	797	PHE	28	-11.448	-13.351
6VSB	798	GLY	23	-9.557	-11.103
6VSB	799	GLY	18	-7.363	-8.587
6VSB	800	PHE	33	-13.238	-15.511
6VSB	801	ASN	17	-12.901	-13.372
6VSB	802	PHE	33	-16.245	-18.172
6VSB	803	SER	11	-11.874	-11.774
6VSB	804	GLN	22	-14.839	-15.663
6VSB	805	ILE	40	-21.205	-23.366
6VSB	806	LEU	24	-17.71	-18.433
6VSB	807	PRO	25	-13.36	-14.698
6VSB	808	ASP	13	-6.681	-7.408
6VSB	809	PRO	4	-2.691	-2.841
6VSB	810	SER	9	-0.669	-1.627
6VSB	811	LYS	19	-3.353	-5.153
6VSB	815	ARG	19	-13.72	-14.327
6VSB	816	SER	34	-16.98	-18.938
6VSB	817	PHE	14	-13.429	-13.495
6VSB	818	ILE	34	-20.776	-22.297
6VSB	819	GLU	30	-20.343	-21.453
6VSB	820	ASP	12	-14.227	-13.971
6VSB	821	LEU	25	-15.617	-16.696
6VSB	822	LEU	34	-20.082	-21.683
6VSB	823	PHE	13	-15.789	-15.468
6VSB	824	ASN	14	-11.293	-11.604
6VSB	825	LYS	33	-12.133	-14.533
6VSB	826	VAL	26	-12.612	-14.152
6VSB	827	THR	8	-11.77	-11.337
6VSB	828	LEU	14	-14.25	-14.221
6VSB	853	GLN	4	-14.923	-13.667
6VSB	854	LYS	14	-15.673	-15.481
6VSB	855	PHE	8	-15.016	-14.209
6VSB	856	ASN	18	-19.43	-19.266
6VSB	857	GLY	23	-20.759	-21.017
6VSB	858	LEU	23	-21.104	-21.322
6VSB	859	THR	12	-17.424	-16.8
6VSB	860	VAL	16	-15.231	-15.32
6VSB	861	LEU	20	-15.497	-16.015
6VSB	862	PRO	6	-12.309	-11.584
6VSB	863	PRO	22	-13.378	-14.37
6VSB	864	LEU	17	-10.871	-11.576
6VSB	865	LEU	28	-13.877	-15.501
6VSB	866	THR	3	-11.601	-10.612
6VSB	867	ASP	17	-13.852	-14.214
6VSB	868	GLU	4	-11.704	-10.818
6VSB	869	MET	11	-12.363	-12.206
6VSB	870	ILE	31	-19.136	-20.5
6VSB	871	ALA	21	-18.894	-19.136
6VSB	872	GLN	8	-15.525	-14.659
6VSB	873	TYR	31	-20.792	-21.966
6VSB	874	THR	36	-23.866	-25.262
6VSB	875	SER	24	-20.22	-20.655
6VSB	876	ALA	18	-18.839	-18.742
6VSB	877	LEU	34	-24.003	-25.153
6VSB	878	LEU	34	-24.479	-25.574
6VSB	879	ALA	22	-21.117	-21.218
6VSB	880	GLY	31	-21.754	-22.817
6VSB	881	THR	32	-23.493	-24.471
6VSB	882	ILE	31	-20.595	-21.792
6VSB	883	THR	20	-16.52	-16.92
6VSB	884	SER	25	-17.219	-18.113
6VSB	885	GLY	22	-20.621	-20.78
6VSB	886	TRP	20	-20.763	-20.675
6VSB	887	THR	18	-16.294	-16.49
6VSB	888	PHE	29	-17.55	-18.867
6VSB	889	GLY	31	-19.987	-21.254
6VSB	890	ALA	10	-13.717	-13.29
6VSB	891	GLY	4	-11.223	-10.392
6VSB	892	ALA	2	-11.293	-10.225
6VSB	893	ALA	23	-13.09	-14.229
6VSB	894	LEU	11	-11.73	-11.646
6VSB	895	GLN	8	-10.461	-10.178
6VSB	896	ILE	19	-10.707	-11.66
6VSB	897	PRO	8	-10.915	-10.58
6VSB	898	PHE	24	-14.819	-15.875
6VSB	899	ALA	18	-12.466	-13.103
6VSB	900	MET	7	-10.689	-10.265
6VSB	901	GLN	32	-13.595	-15.711
6VSB	902	MET	31	-14.362	-16.276
6VSB	903	ALA	18	-10.921	-11.735
6VSB	904	TYR	16	-10.696	-11.306
6VSB	905	ARG	35	-14.219	-16.608
6VSB	906	PHE	29	-11.363	-13.391
6VSB	907	ASN	13	-8.73	-9.221
6VSB	908	GLY	24	-10.066	-11.669
6VSB	909	ILE	30	-9.347	-11.722
6VSB	910	GLY	21	-6.613	-8.268
6VSB	911	VAL	34	-7.041	-10.142
6VSB	912	THR	19	-3.445	-5.233
6VSB	913	GLN	7	-3.999	-4.344
6VSB	914	ASN	7	-1.117	-1.794
6VSB	915	VAL	27	-3.178	-5.918
6VSB	916	LEU	27	-7.349	-9.608
6VSB	917	TYR	9	-2.702	-3.426
6VSB	918	GLU	13	-2.285	-3.517
6VSB	919	ASN	22	-2.663	-4.887
6VSB	920	GLN	17	-4.776	-6.182
6VSB	921	LYS	1	-4.338	-3.955
6VSB	922	LEU	11	-3.549	-4.406
6VSB	923	ILE	28	-9.024	-11.206
6VSB	924	ALA	19	-10.207	-11.218
6VSB	925	ASN	7	-6.873	-6.888
6VSB	926	GLN	20	-9.929	-11.087
6VSB	927	PHE	30	-15.028	-16.75
6VSB	928	ASN	14	-13.447	-13.51
6VSB	929	SER	8	-12.315	-11.818
6VSB	930	ALA	24	-17.232	-18.011
6VSB	931	ILE	24	-19.289	-19.83
6VSB	932	GLY	8	-16.193	-15.251
6VSB	933	LYS	14	-14.574	-14.508
6VSB	934	ILE	35	-18.903	-20.754
6VSB	935	GLN	15	-15.999	-15.884
6VSB	936	ASP	6	-11.997	-11.307
6VSB	937	SER	16	-13.895	-14.137
6VSB	938	LEU	33	-14.618	-16.732
6VSB	939	SER	11	-10.443	-10.507
6VSB	940	SER	5	-9.793	-9.242
6VSB	941	THR	12	-11.729	-11.76
6VSB	942	ALA	4	-12.537	-11.555
6VSB	943	SER	4	-15.535	-14.208
6VSB	944	ALA	26	-17.904	-18.835
6VSB	945	LEU	35	-19.748	-21.502
6VSB	946	GLY	8	-17.464	-16.376
6VSB	947	LYS	18	-19.421	-19.257
6VSB	948	LEU	29	-21.513	-22.374
6VSB	949	GLN	12	-15.686	-15.262
6VSB	950	ASP	14	-17.622	-17.205
6VSB	951	VAL	30	-18.874	-20.154
6VSB	952	VAL	17	-17.889	-17.787
6VSB	953	ASN	9	-16.189	-15.362
6VSB	954	GLN	21	-15.915	-16.5
6VSB	955	ASN	33	-18.188	-19.892
6VSB	956	ALA	10	-17.15	-16.328
6VSB	957	GLN	11	-16.998	-16.308
6VSB	958	ALA	28	-18.566	-19.651
6VSB	959	LEU	24	-18.469	-19.105
6VSB	960	ASN	11	-18.071	-17.258
6VSB	961	THR	18	-19.997	-19.767
6VSB	962	LEU	31	-21.718	-22.786
6VSB	963	VAL	16	-21.866	-21.192
6VSB	964	LYS	13	-20.158	-19.335
6VSB	965	GLN	26	-20.449	-21.087
6VSB	966	LEU	21	-21.258	-21.228
6VSB	967	SER	7	-18.782	-17.427
6VSB	968	SER	22	-17.633	-18.135
6VSB	969	ASN	4	-14.229	-13.053
6VSB	970	PHE	23	-15.117	-16.024
6VSB	971	GLY	8	-10.698	-10.388
6VSB	972	ALA	29	-12.695	-14.57
6VSB	973	ILE	15	-9.574	-10.198
6VSB	974	SER	13	-10.533	-10.816
6VSB	975	SER	7	-15.464	-14.491
6VSB	976	VAL	5	-16.411	-15.099
6VSB	977	LEU	27	-18.147	-19.165
6VSB	978	ASN	6	-14.597	-13.608
6VSB	979	ASP	9	-12.353	-11.967
6VSB	980	ILE	28	-12.887	-14.625
6VSB	981	LEU	18	-12.309	-12.964
6VSB	982	SER	7	-10.059	-9.707
6VSB	983	ARG	7	-8.288	-8.14
6VSB	984	LEU	20	-8.838	-10.122
6VSB	985	ASP	2	-7.194	-6.597
6VSB	986	PRO	7	-9.004	-8.774
6VSB	987	PRO	1	-7.587	-6.83
6VSB	988	GLU	9	-8.866	-8.882
6VSB	989	ALA	19	-11.545	-12.403
6VSB	990	GLU	10	-13.742	-13.312
6VSB	991	VAL	5	-12.761	-11.869
6VSB	992	GLN	20	-14.018	-14.706
6VSB	993	ILE	30	-17.713	-19.126
6VSB	994	ASP	11	-17.198	-16.485
6VSB	995	ARG	17	-15.987	-16.104
6VSB	996	LEU	34	-19.465	-21.136
6VSB	997	ILE	26	-21.212	-21.763
6VSB	998	THR	9	-19.757	-18.52
6VSB	999	GLY	24	-18.995	-19.571
6VSB	1000	ARG	35	-21.222	-22.807
6VSB	1001	LEU	20	-22.349	-22.079
6VSB	1002	GLN	9	-19.924	-18.668
6VSB	1003	SER	28	-21.112	-21.904
6VSB	1004	LEU	32	-23.352	-24.346
6VSB	1005	GLN	9	-20.804	-19.446
6VSB	1006	THR	17	-18.95	-18.726
6VSB	1007	TYR	35	-20.032	-21.753
6VSB	1008	VAL	24	-19.001	-19.576
6VSB	1009	THR	7	-15.622	-14.631
6VSB	1010	GLN	15	-13.858	-13.99
6VSB	1011	GLN	35	-17.442	-19.461
6VSB	1012	LEU	13	-15.334	-15.065
6VSB	1013	ILE	8	-12.196	-11.714
6VSB	1014	ARG	25	-15.653	-16.728
6VSB	1015	ALA	22	-17.966	-18.43
6VSB	1016	ALA	6	-14.566	-13.581
6VSB	1017	GLU	17	-14.637	-14.909
6VSB	1018	ILE	34	-19.349	-21.034
6VSB	1019	ARG	12	-17.711	-17.054
6VSB	1020	ALA	5	-15.606	-14.386
6VSB	1021	SER	24	-20.759	-21.132
6VSB	1022	ALA	26	-21.524	-22.039
6VSB	1023	ASN	6	-17.022	-15.755
6VSB	1024	LEU	17	-19.822	-19.498
6VSB	1025	ALA	35	-25.061	-26.204
6VSB	1026	ALA	20	-23.668	-23.246
6VSB	1027	THR	11	-21.171	-20.001
6VSB	1028	LYS	34	-25.102	-26.126
6VSB	1029	MET	36	-28.775	-29.606
6VSB	1030	SER	14	-21.825	-20.925
6VSB	1031	GLU	16	-22.774	-21.995
6VSB	1032	CYS	34	-27.029	-27.83
6VSB	1033	VAL	32	-28.373	-28.79
6VSB	1034	LEU	25	-25.138	-25.122
6VSB	1035	GLY	14	-23.865	-22.731
6VSB	1036	GLN	23	-22.49	-22.549
6VSB	1037	SER	29	-21.533	-22.392
6VSB	1038	LYS	5	-14.06	-13.018
6VSB	1039	ARG	10	-12.026	-11.793
6VSB	1040	VAL	6	-12.558	-11.804
6VSB	1041	ASP	0	-15.408	-13.636
6VSB	1042	PHE	19	-19.414	-19.366
6VSB	1043	CYS	32	-26.489	-27.123
6VSB	1044	GLY	29	-23.351	-24.001
6VSB	1045	LYS	7	-18.415	-17.102
6VSB	1046	GLY	24	-14.182	-15.311
6VSB	1047	TYR	20	-13.814	-14.525
6VSB	1048	HIS	27	-19.55	-20.407
6VSB	1049	LEU	32	-20.686	-21.987
6VSB	1050	MET	33	-25.676	-26.519
6VSB	1051	SER	36	-28.732	-29.568
6VSB	1052	PHE	35	-28.594	-29.331
6VSB	1053	PRO	43	-28.943	-30.56
6VSB	1054	GLN	36	-25.326	-26.553
6VSB	1055	SER	29	-24.179	-24.733
6VSB	1056	ALA	36	-23.416	-24.864
6VSB	1057	PRO	23	-20.999	-21.229
6VSB	1058	HIS	32	-23.574	-24.543
6VSB	1059	GLY	31	-25.141	-25.815
6VSB	1060	VAL	42	-27.31	-29
6VSB	1061	VAL	34	-26.62	-27.468
6VSB	1062	PHE	34	-29.819	-30.3
6VSB	1063	LEU	35	-29.082	-29.762
6VSB	1064	HIS	28	-28.212	-28.188
6VSB	1065	VAL	36	-24.932	-26.205
6VSB	1066	THR	23	-19.883	-20.241
6VSB	1067	TYR	33	-13	-15.3
6VSB	1068	VAL	17	-10.982	-11.674
6VSB	1069	PRO	16	-7.135	-8.154
6VSB	1070	ALA	11	-5.56	-6.186
6VSB	1071	GLN	9	-2.775	-3.491
6VSB	1072	GLU	19	-3.514	-5.295
6VSB	1073	LYS	17	-3.119	-4.715
6VSB	1074	ASN	9	-3.164	-3.835
6VSB	1075	PHE	29	-5.482	-8.187
6VSB	1076	THR	12	-7.216	-7.766
6VSB	1077	THR	24	-8.376	-10.172
6VSB	1078	ALA	29	-9.918	-12.112
6VSB	1079	PRO	14	-9.904	-10.375
6VSB	1080	ALA	21	-9.777	-11.067
6VSB	1081	ILE	27	-9.469	-11.485
6VSB	1082	CYS	12	-9.402	-9.7
6VSB	1083	HIS	20	-7.635	-9.057
6VSB	1084	ASP	7	-7.166	-7.146
6VSB	1085	GLY	0	-8.122	-7.188
6VSB	1086	LYS	13	-8.811	-9.293
6VSB	1087	ALA	14	-9.706	-10.2
6VSB	1088	HIS	26	-8.837	-10.811
6VSB	1089	PHE	11	-8.919	-9.159
6VSB	1090	PRO	22	-6.518	-8.299
6VSB	1091	ARG	11	-5.342	-5.993
6VSB	1092	GLU	14	-4.787	-5.846
6VSB	1093	GLY	27	-6.386	-8.756
6VSB	1094	VAL	23	-7.766	-9.518
6VSB	1095	PHE	30	-8.191	-10.699
6VSB	1096	VAL	23	-7.259	-9.069
6VSB	1097	SER	18	-6.671	-7.973
6VSB	1098	ASN	13	-3.372	-4.479
6VSB	1099	GLY	1	-3.789	-3.468
6VSB	1100	THR	0	-3.877	-3.431
6VSB	1101	HIS	8	-2.903	-3.489
6VSB	1102	TRP	25	-5.434	-7.684
6VSB	1103	PHE	16	-4.744	-6.039
6VSB	1104	VAL	23	-6.061	-8.009
6VSB	1105	THR	25	-4.965	-7.269
6VSB	1106	GLN	18	-3.985	-5.596
6VSB	1107	ARG	13	-5.243	-6.135
6VSB	1108	ASN	22	-4.809	-6.786
6VSB	1109	PHE	22	-3.788	-5.882
6VSB	1110	TYR	20	-3.596	-5.482
6VSB	1111	GLU	19	-1.693	-3.684
6VSB	1112	PRO	19	-2.631	-4.513
6VSB	1113	GLN	24	-1.962	-4.496
6VSB	1114	ILE	8	-3.3	-3.84
6VSB	1115	ILE	30	-5.335	-8.172
6VSB	1116	THR	11	-5.267	-5.927
6VSB	1117	THR	10	-4.712	-5.32
6VSB	1118	ASP	4	-3.016	-3.129
6VSB	1119	ASN	21	-5.822	-7.567
6VSB	1120	THR	32	-6.618	-9.537
6VSB	1121	PHE	5	-6.941	-6.718
6VSB	1122	VAL	19	-7.393	-8.728
6VSB	1123	SER	7	-8.146	-8.014
6VSB	1124	GLY	14	-8.623	-9.242
6VSB	1125	ASN	3	-8.874	-8.198
6VSB	1126	CYS	13	-10.241	-10.558
6VSB	1127	ASP	0	-8.832	-7.816
6VSB	1128	VAL	8	-9.316	-9.164
6VSB	1129	VAL	23	-10.811	-12.212
6VSB	1130	ILE	1	-10.25	-9.186
6VSB	1131	GLY	13	-10.054	-10.393
6VSB	1132	ILE	24	-10.368	-11.936
6VSB	1133	VAL	21	-9.371	-10.709
6VSB	1134	ASN	3	-8.039	-7.459
6VSB	1135	ASN	32	-6.961	-9.84
6VSB	1136	THR	4	-6.446	-6.165
6VSB	1137	VAL	25	-6.286	-8.438
6VSB	1138	TYR	12	-3.952	-4.877
6VSB	1139	ASP	13	-2.851	-4.018
6VSB	1140	PRO	7	-0.961	-1.656
6VSB	1141	LEU	5	-0.257	-0.802
6VSB	1142	GLN	7	0.318	-0.523
6VSB	1143	PRO	6	1.067	0.255
6VSB	1144	GLU	6	0.716	-0.056
6VSB	1145	LEU	5	0.162	-0.431
6VSB	1146	ASP	5	0.731	0.072
