# Supplementary material for: Revelation of Potent Epitopes Present in Unannotated ORF Antigens of SARS-CoV-2 for Epitope-Based Polyvalent Vaccine Design Using Immunoinformatics Approach
Source: Front Immunol. 2021 Aug 23;12:692937. doi: 10.3389/fimmu.2021.692937 (PMC8419283; doi:10.3389/fimmu.2021.692937)
Supplement: Supplementary file 15 [file DataSheet_15.xlsx]

## Sheet: A
Table S15(A). List of promiscuous CD8+ T-cell epitopes corresponding to the uORF proteins which are excluded for the vaccine design although they have good immunogenicity. The amino acid sequence of an epitope (column A) located in a particular protein (column B) is given along with the total number (column C) of HLA class I alleles to which the epitope binds with. Subsequently, the top percentil…
Epitopes	Protein	Allele count	Top percentil rank	Top allele	MHC 1 immunogenicity score	Antigenicity score	Validation	Reason for exclusion
ELPDEFVVV	N_iORF1	7	0.13	HLA-A*68:02;	0.28538	0.3824		low antigenicity score
ELPDEFVVV	N_iORF2	7	0.13	HLA-A*68:02;	0.28538	0.3824		low antigenicity score
HFLLFFRAL	3a_iORF1	5	0.21	HLA-C*14:02;	0.27598	0.3297		low antigenicity score
HLRIAGHHL	M.ext	11	0.15	HLA-B*08:01;	0.26692	0.2446	Grifoni et al.,2020, Sekine et al.,2020	low antigenicity score
KLFIRQEEV	7a_iORF1	12	0.04	HLA-B*13:02;	0.25628	0.0755	Dong et al.,2020 , Sekine et al.,2020	low antigenicity score
LPKEITVAT	M.ext	7	0.01	HLA-B*55:01;HLA-B*56:01;	0.25459	0.2798	Dong et al.,2020, Sekine et al.,2020	low antigenicity score
TKLATTEEL	N_iORF1	4	0.11	HLA-B*39:01;	0.25311	0.3633		low antigenicity score
TKLATTEEL	N_iORF2	4	0.11	HLA-B*39:01;	0.25311	0.3633		low antigenicity score
VFLFGTLIL	M.ext	8	0.2	HLA-C*14:02;	0.25214	-0.0272		low antigenicity score

## Sheet: B
Table S15(B). List of promiscuous CD4+ T-cell epitopes corresponding to the uORF proteins which are excluded for the vaccine design although they have good immunogenicity. The amino acid sequence of an epitope (column A) located in a particular protein (column B) is given along with the total number (column C) of HLA class II alleles to which the epitope binds with. Subsequently, the top percenti…
Peptide	Protein	Allele count	Top percentile rank	Top allele	CD4+ immunogenicity Score	Antigenicity score	IC50(nM)	Validation	Reason for exclusion
DYIINLIIKNLSKSL	6_iORF	3	0.46	HLA-DRB1*13:02;	39.0184	0.2085			low antigenicity score
GLMWLSYFIASFRLF	M.ext	3	0.05	HLA-DPA1*01:03/DPB1*02:01;	35.0038	0.0766			low antigenicity score
IINLIIKNLSKSLTE	6_iORF	3	0.31	HLA-DRB1*13:02;	37.1814	0.1462			low antigenicity score
INLIIKNLSKSLTEN	6_iORF	3	0.31	HLA-DRB1*13:02;	38.4739	0.2443			low antigenicity score
LMWLSYFIASFRLFA	M.ext	3	0.05	HLA-DPA1*01:03/DPB1*02:01;	35.567	0.1022			low antigenicity score
LSYFIASFRLFARTR	M.ext	4	0.56	HLA-DPA1*01:03/DPB1*02:01;	38.2582	0.3427			low antigenicity score
MWLSYFIASFRLFAR	M.ext	4	0.08	HLA-DPA1*01:03/DPB1*02:01;	39.5233	0.0043			low antigenicity score
WLSYFIASFRLFART	M.ext	4	0.16	HLA-DPA1*01:03/DPB1*02:01;	40.6913	0.0462			low antigenicity score
YIINLIIKNLSKSLT	6_iORF	3	0.3	HLA-DRB1*13:02;	36.612	0.2621		Mateus et al.,2020	low antigenicity score
PIFLIVAAIVFITLC	7a_iORF2	2	0.47	HLA-DPA1*02:01/DPB1*01:01;HLA-DRB1*07:01;	40.5349	0.5949	3182.97		excluded due to low affinity
